## The dystrophin-associated protein complex

Jeffrey Ehmsen, Ellen Poon and Kay Davies\*

Functional Genetics Unit, Department of Human Anatomy and Genetics, University of Oxford, South Parks Road, Oxford, UK

\*Author for correspondence  
(e-mail: kay.davies@anat.ox.ac.uk)

*Journal of Cell Science* 115, 2801-2803 (2002)  
© The Company of Biologists Ltd

The lethal muscle-wasting disorder, Duchenne muscular dystrophy, is caused by mutations or deletions in the dystrophin gene. In skeletal and cardiac muscle, dystrophin associates with various proteins to form the dystrophin-associated protein complex (DAPC).

The DAPC is thought to play a structural role in linking the actin cytoskeleton to the extracellular matrix, stabilizing the sarcolemma during repeated cycles of contraction and relaxation, and transmitting force generated in the muscle sarcomeres to the extracellular matrix (Petrof et al., 1993). There is also evidence that the DAPC is involved in cell signalling via its interactions with calmodulin, Grb2 and nNOS (Rando, 2001). Various members of the DAPC, such as the sarcoglycans, have already been implicated in a number of muscle diseases, illustrating the vital role this complex plays in the maintenance of muscle integrity. This brief review offers a glimpse of the major known proteins that constitute the DAPC and the defects caused by their absence.

### Dystrophin

The muscle isoform of dystrophin is a 427 kDa protein consisting of an N-terminal actin-binding domain, a central rod-like domain comprising 24 spectrin-like triple helical coiled coils, and a cysteine-rich C-terminus that allows assembly of the DAPC. Dystrophin stretches laterally along F-actin filaments, binding primarily via three sites within the N-terminal region (Norwood et al., 2000) and electrostatically through a cluster of basic repeats (11-17) within the rod domain (Amann et al., 1998). Although remarkable evolutionary conservation exists, with even the *C. elegans* homologue possessing the same number of spectrin repeats, much of the rod domain appears dispensable and a dystrophin molecule comprising at least eight integral repeats remains relatively

Journal of  
**Cell Science**

## The Dystrophin-Associated Protein Complex

Jeffrey Ehmsen, Ellen Poon and Kay Davies

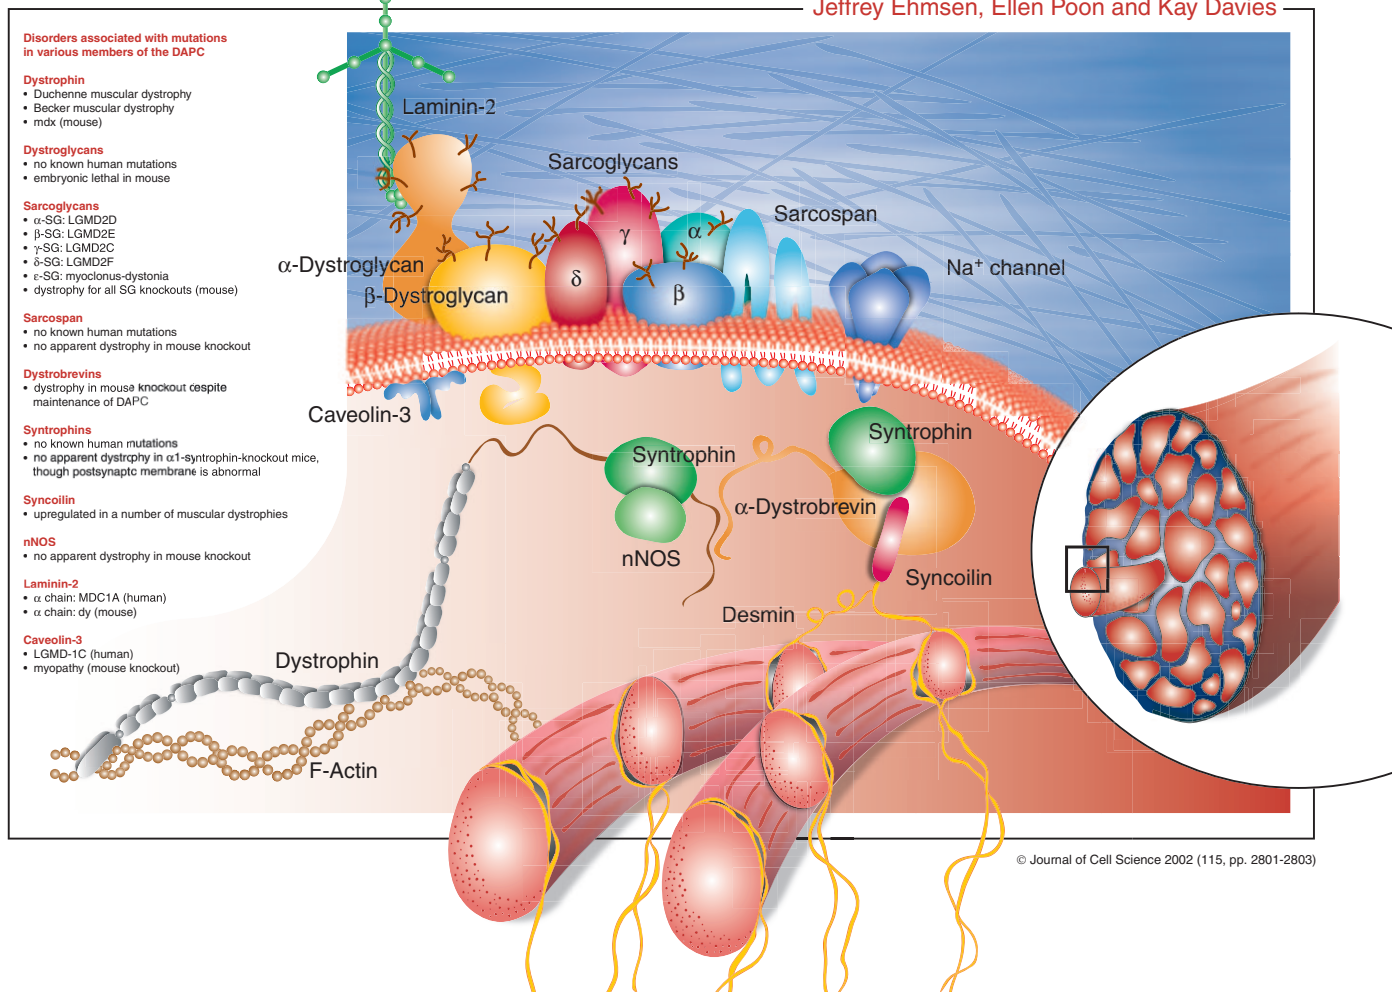

© Journal of Cell Science 2002 (115, pp. 2801-2803)

(See poster insert)

functional (Harper et al., 2002). Dystrophin deficiency results in loss of the associated protein complex and severe muscular dystrophy, underscoring the central role that dystrophin plays in assembling and maintaining the link between cytoskeletal actin and the extracellular matrix.

### Dystroglycans

The widely expressed  $\alpha$  and  $\beta$  dystroglycans make up the core of the DAPC, establishing the transmembrane link between laminin-2 and dystrophin. Both proteins are produced from a single post-translationally modified polypeptide, and are heavily glycosylated prior to being sorted to their respective extracellular and transmembrane locations. These glycosylation patterns are developmentally regulated and largely correlate with the diversity of binding partners in different tissues (Winder, 2001). Total deletion of dystroglycan in mouse is embryonic lethal owing to disruption of formation of the extra-embryonic basement membrane, and the void of naturally occurring mutations or other dystroglycan-associated diseases suggests that its function is indispensable for survival (Williamson et al., 1997). Disrupting the dystroglycan-dystrophin link causes a Duchenne-like phenotype, whereas disruption of the laminin-dystroglycan link causes congenital muscular dystrophy. Defects in post-translational modification of dystroglycan may also be pathogenic, as a nonsense mutation in the glycosyltransferase, *Large*, is the primary defect in the myodystrophy mouse (Grewal et al., 2001).

### Sarcoglycans

Five transmembrane proteins, all expressed primarily in skeletal muscle, constitute the sarcoglycan family:  $\alpha$  (50 kDa, also called adhalin),  $\beta$  (43 kDa),  $\gamma$  (35 kDa),  $\delta$  (35 kDa) and  $\epsilon$  (50 kDa). The  $\beta$ ,  $\gamma$  and  $\delta$  sarcoglycans co-purify, with  $\beta$  and  $\delta$  forming an especially tight link, whereas  $\alpha$  sarcoglycan may be spatially separated. Dystrophin and  $\gamma$  sarcoglycan can interact directly, and  $\delta$  sarcoglycan appears to be coordinated to the dystroglycan complex (Chan et al., 1998). Mutations abolishing the expression of any one of the sarcoglycans cause loss of the others from the sarcolemma; the four recessive

limb girdle muscular dystrophies 2D, 2E, 2C and 2F are caused by absence of the  $\alpha$ ,  $\beta$ ,  $\gamma$  or  $\delta$  sarcoglycans, respectively (Bushby, 1999).

### Sarcospan

Sarcospan is a 25 kDa membrane protein with four transmembrane domains and intracellular N- and C-termini, a unique feature for transmembrane proteins of the DAPC (Crosbie et al., 1997). Expression is seen predominantly in skeletal and cardiac muscle, but shorter isoforms exist in other tissues. No human disease is currently known to be associated with sarcospan deficiency, and sarcospan-null mice maintain expression of all sarcoglycans at the sarcolemma and do not develop muscular dystrophy (Lebakken et al., 2000).

### $\alpha$ -Dystrobrevins

Alternative splicing produces five  $\alpha$ -dystrobrevin isoforms, differing as C-terminal truncations. Three of these are found in muscle, but only  $\alpha$ -dystrobrevin-2 is abundantly expressed at the sarcolemma. This isoform contains two tandem  $\alpha$ -helical syntrophin-binding sites, which may be alternatively spliced to modulate the stoichiometry of syntrophin association with the DAPC (Newey et al., 2000). As dystrobrevin contains several tyrosine kinase consensus sites, protein-protein interactions may also be regulated by tyrosine phosphorylation. Dystrobrevin associates with dystrophin via coiled-coil interactions, but an independent link with the sarcoglycan/sarcospan complex might also exist as dystrobrevin and syntrophin can bind to the DAPC in the absence of the C-terminal region of dystrophin (Crawford et al., 2000). Intriguingly, dystrobrevin-knockout mice present with a DMD-like phenotype while retaining the DAPC and sarcolemmal integrity. Loss of dystrobrevin is expected to disrupt the syntrophin-mediated link between the DAPC and desmin intermediate filaments (see below), perhaps contributing to dystrophy. Alternatively, the coordinate reduction of sarcolemmal nNOS that is observed in these knockouts suggests that signalling defects may be at fault (Grady et al., 1999).

### Syntrophins

All three of the 58 kDa syntrophin isoforms are found at the neuromuscular junction in skeletal muscle, but only the  $\alpha 1$  and  $\beta 1$  isoforms are present along the sarcolemma. Each contains two pleckstrin homology (PH) domains, which are modules of ~100 amino acids found in many signalling proteins. Within each first syntrophin PH domain is a PDZ domain capable of facilitating homo- and hetero-dimerization with other PDZ-containing proteins. Indeed, through these types of interactions, the syntrophins may function as modular adaptors in recruiting signalling proteins to the sarcolemma and DAPC: binding interactions exist with skeletal muscle sodium channels, nNOS, serine/threonine kinases, MAST205 and stress-activated protein kinase-3 (Rando, 2001). The highly conserved C-terminal 57 amino acids [constituting the syntrophin-unique (SU) domain] probably contain binding sites for dystrophin family members. No human disease has been correlated with syntrophin mutations. Mice lacking  $\alpha 1$  syntrophin (the predominant muscle isoform) display no overt phenotype, but nNOS is absent from the sarcolemma and the postsynaptic membrane is grossly abnormal (Kameya et al., 1999; Adams et al., 2000).

### Syncoilin

Syncoilin was first identified via its interaction with  $\alpha$ -dystrobrevin in muscle (Newey et al., 2001). Sequence analysis revealed the presence of a unique N-terminus domain and a coiled-coil domain that is typical of those found in intermediate filament proteins. Syncoilin is highly expressed in skeletal, cardiac and smooth muscle at the sarcolemma, Z-lines and neuromuscular junction. Through its interaction with desmin, syncoilin is thought to provide a link between the DAPC at the sarcolemma and the intermediate filament protein network (Poon et al., 2002). Its upregulation in a range of muscular dystrophies may be a compensatory mechanism against muscle damage.

### nNOS

The production of nitric oxide (NO) by nNOS is important for increasing local blood flow to match the increased metabolic load of contracting muscles,



such as during exercise. The presence of nNOS at the sarcolemma is mediated through PDZ domain interactions with syntrophin, and it is lost in a number of muscular dystrophies including DMD. Indeed, patients with DMD show abnormal blood vessel constriction presumably due to lack of nNOS at the sarcolemma, and it is the only other protein known to correlate so closely with the fiber-type-specific onset of dystrophy. This observation is in accordance with the supposed role of the DAPC in signalling and the contribution of ischemic stress to muscle degeneration. However, abolishing nNOS expression alone in mice does not cause overt dystrophy (Crosbie et al., 1998; Chao et al., 1998).

### Laminin-2

Laminin-2 is composed of  $\alpha 2$ ,  $\beta 1$  and  $\gamma 1$  chains and binds to  $\alpha$ -dystroglycan and the  $\alpha 7 \beta 1$  integrin complex. Laminins are thought to form the structural part of the basement membranes along with collagen IV, nidogen and perlecan. Mutations of the laminin  $\alpha 2$  gene cause severe congenital muscular dystrophy but do not appear to cause damage to the sarcolemma (Patton, 2000).

### Caveolin-3

Caveolae are vesicular invaginations of the plasma membrane and are found in most cell types. The primary scaffolding protein of skeletal muscle caveolae is caveolin-3, and although traditionally considered distinct from the DAPC, a number of studies imply an important relationship. Caveolin-3 interacts directly with the C-terminus of  $\beta$ -dystroglycan, co-fractionates with dystrophin and  $\alpha$ -sarcoglycan, and shows elevated expression in Duchenne muscular dystrophy. Transgenic mice overexpressing caveolin-3 present with DMD-like pathology, suggesting that competitive downregulation of dystrophin at the sarcolemma may occur. Mutations in caveolin-3 are associated with autosomal dominant limb-girdle muscular dystrophy (LGMD-1C), hyperCKemia and rippling muscle disease (Galbiati et al., 2001).

### Sodium channels

Voltage-gated sodium channels bind to syntrophin PDZ domains, an interaction

that may influence ion conduction properties or association with other channels (Gee et al., 1998). However, even in the absence of syntrophin, normal sodium channel distribution is seen along the sarcolemma, suggesting that this interaction is not essential for channel localization (Adams et al., 2001; Ribaux et al., 2001).

### References

- Adams, M. E., Kramarcy, N., Krall, S. P., Rossi, S. G., Rotundo, R. L., Sealock, R. and Froehner, S. C. (2000). Absence of alpha-syntrophin leads to structurally aberrant neuromuscular synapses deficient in utrophin. *J. Cell Biol.* **150**, 1385-1398.
- Adams, M. E., Mueller, H. A. and Froehner, S. C. (2001). In vivo requirement of the  $\alpha$ -syntrophin PDZ domain for the sarcolemmal localization of nNOS and aquaporin-4. *J. Cell Biol.* **155**, 113-122.
- Amann, K. J., Renley, B. A. and Ervasti, J. M. (1998). A cluster of basic repeats in the dystrophin rod domain binds F-actin through an electrostatic interaction. *J. Biol. Chem.* **273**, 28419-28423.
- Bushby, K. M. (1999). Making sense of the limb-girdle muscular dystrophies. *Brain* **122**, 1403-1420.
- Chan, Y. M., Bonnemann, C. G., Lidov, H. G. and Kunkel, L. M. (1998). Molecular organization of sarcoglycan complex in mouse myotubes in culture. *J. Cell Biol.* **143**, 2033-2044.
- Chao, D. S., Silvagno, F. and Bredt, D. S. (1998). Muscular dystrophy in *mdx* mice despite lack of neuronal nitric oxide synthase. *J. Neurochem.* **71**, 784-789.
- Crawford, G. E., Faulkner, J. A., Crosbie, R. H., Campbell, K. P., Froehner, S. C. and Chamberlain, J. S. (2000). Assembly of the dystrophin-associated protein complex does not require the dystrophin COOH-terminal domain. *J. Cell Biol.* **150**, 1399-1410.
- Crosbie, R. H., Heighway, J., Venzke, D. P., Lee, J. C. and Campbell, K. P. (1997). Sarcospan, the 25-kDa transmembrane component of the dystrophin-glycoprotein complex. *J. Biol. Chem.* **272**, 31221-31224.
- Crosbie, R. H., Straub, V., Yun, H. Y., Lee, J. C., Rafael, J. A., Chamberlain, J. S., Dawson, V. L., Dawson, T. M. and Campbell, K. P. (1998). *mdx* muscle pathology is independent of nNOS perturbation. *Hum. Mol. Genet.* **7**, 823-829.
- Galbiati, F., Razani, B. and Lisanti, M. P. (2001). Caveolae and caveolin-3 in muscular dystrophy. *Trends Mol. Med.* **7**, 435-441.
- Gee, S. H., Madhavan, R., Levinson, S. R., Caldwell, J. H., Sealock, R. and Froehner, S. C. (1998). Interaction of muscle and brain sodium channels with multiple members of the syntrophin family of dystrophin-associated proteins. *J. Neurosci.* **18**, 128-137.
- Grady, R. M., Grange, R. W., Lau, K. S., Maimone, M. M., Nichol, M. C., Stull, J. T. and Sanes, J. R. (1999). Role for alpha-dystrobrevin in the pathogenesis of dystrophin-dependent muscular dystrophies. *Nat. Cell Biol.* **1**, 215-220.
- Grewal, P. K., Holzfeind, P. J., Bittner, R. E. and Hewitt, J. E. (2001). Mutant glycosyltransferase and altered glycosylation of  $\alpha$ -dystroglycan in the myodystrophy mouse. *Nat. Genet.* **28**, 151-154.
- Harper, S. Q., Hauser, M. A., DelloRusso, C., Duan, D., Crawford, R. W., Phelps, S. F., Harper, H. A., Robinson, A. S., Engelhardt, J. F., Brooks, S. V. and Chamberlain, J. S. (2002). Modular flexibility of dystrophin: Implications for gene therapy of Duchenne muscular dystrophy. *Nat. Med.* **8**, 253-261.
- Kameya, S., Miyagoe, Y., Nonaka, I., Ikemoto, T., Endo, M., Hanaoka, K., Nabeshima, Y. and Takeda, S. (1999). alpha-syntrophin gene disruption results in the absence of neuronal-type nitric-oxide synthase at the sarcolemma but does not induce muscle degeneration. *J. Biol. Chem.* **274**, 2193-2200.
- Lebakken, C. S., Venzke, D. P., Hrstka, R. F., Consolino, C. M., Faulkner, J. A., Williamson, R. A. and Campbell, K. P. (2000). Sarcospan-deficient mice maintain normal muscle function. *Mol. Cell Biol.* **20**, 1669-1677.
- Newey, S. E., Benson, M. A., Ponting, C. P., Davies, K. E. and Blake, D. J. (2000). Alternative splicing of dystrobrevin regulates the stoichiometry of syntrophin binding to the dystrophin protein complex. *Curr. Biol.* **10**, 1295-1298.
- Newey, S. E., Howman, E. V., Ponting, C. P., Benson, M. A., Nawroztzki, R., Loh, N. Y., Davies, K. E. and Blake, D. J. (2001). Syncoilin, a novel member of the intermediate filament superfamily that interacts with alpha-dystrobrevin in skeletal muscle. *J. Biol. Chem.* **276**, 6645-6655.
- Norwood, F. L., Sutherland-Smith, A. J., Keep, N. H. and Kendrick-Jones, J. (2000). The structure of the N-terminal actin-binding domain of human dystrophin and how mutations in this domain may cause Duchenne or Becker muscular dystrophy. *Structure Fold. Des.* **8**, 481-491.
- Patton, B. L. (2000). Laminins of the neuromuscular system. *Microsc. Res. Tech.* **51**, 247-261.
- Petrof, B. J., Shrager, J. B., Stedman, H. H., Kelly, A. M. and Sweeney, H. L. (1993). Dystrophin protects the sarcolemma from stresses developed during muscle contraction. *Proc. Natl. Acad. Sci. USA* **90**, 3710-3714.
- Poon, E., Howman, E. V., Newey, S. E. and Davies, K. E. (2002). Association of syncoilin and desmin: linking intermediate filament proteins to the dystrophin-associated protein complex. *J. Biol. Chem.* **277**, 3433-3439.
- Rando, T. (2001). The dystrophin-glycoprotein complex, cellular signalling, and the regulation of cell survival in the muscular dystrophies. *Muscle Nerve* **24**, 1575-1594.
- Ribaux, P., Bleicher, F., Couble, M. L., Amsellem, J., Cohen, S. A., Berthier, C. and Blaineau, S. (2001). Voltage-gated sodium channel (SkM1) content in dystrophin-deficient muscle. *Pflügers Arch.* **441**, 746-755.
- Williamson, R. A., Henry, M. D., Daniels, K. J., Hrstka, R. F., Lee, J. C., Sunada, Y., Ibraghimov-Beskrovnaya, O. and Campbell, K. P. (1997). Dystroglycan is essential for early embryonic development: disruption of Reichert's membrane in Dag1-null mice. *Hum. Mol. Genet.* **6**, 831-841.
- Winder, S. J. (2001). The complexities of dystroglycan. *Trends Biol. Sci.* **26**, 118-124.

**Cell Science at a Glance on the Web**  
Electronic copies of the poster insert are available in the online version of this article at [jcs.biologists.org](http://jcs.biologists.org). The JPEG images can be downloaded for printing or used as slides.

## Commentaries

JCS Commentaries highlight and critically discuss recent exciting work that will interest those working in cell biology, molecular biology, genetics and related disciplines. These short reviews are commissioned from leading figures in the field and are subject to rigorous peer-review and in-house editorial appraisal. Each issue of the journal contains at least two Commentaries. JCS thus provides readers with more than 50 Commentaries over the year, which cover the complete spectrum of cell science. The following are just some of the Commentaries appearing in JCS over the coming months.

Hedgehog signalling *Phillip Ingham*

Nuclear envelope breakdown *Jan Ellenberg*

Signalling selectivity of GSK3 *Jim Woodgett*

mRNA localization *Robert Singer*

Centromere biology *Robin Allshire*

The biological activities of collagen fragments *Zena Werb*

Subcellular compartmentalization in NO signalling *David Bredt*

Integrins and apoptosis *David Cheresh*

Interactions between Ras- and Rho-dependent signalling pathways in cell transformation *Chris Marshall*

Signalling in three dimensions *Mina Bissell*

Tensegrity *Donald Ingber*

Interactions of kinesin motors with cargo *Bruce Schnapp*

Expanding the view of inositol signaling: the genomic era *John York*

The functions of NF-ATc *Anjana Rao*

Although we discourage submission of unsolicited Commentaries to the journal, ideas for future articles – in the form of a short proposal and some key references – are welcome and should be sent to the Executive Editor at the address below.

Journal of Cell Science, Bidder Building, 140 Cowley Rd, Cambridge, UK CB4 0DL  
E-mail: [jcs@biologists.com](mailto:jcs@biologists.com); <http://jcs.biologists.org>
